# Supplementary material
Source: Springer Nature journal article supplement (https://www.springermedizin.de/resource/supplementary/12985_2010_796_MOESM3_ESM.pdf/9609212)

0 h

12 h

24 h

48 h

Caspase-3

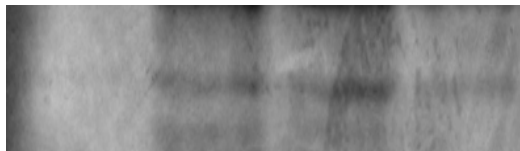

12Kd

Caspase-9

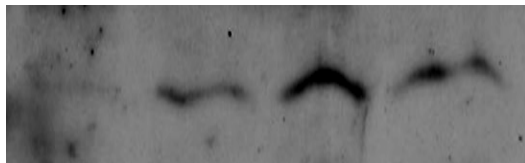

17Kd

$\beta$ -actin

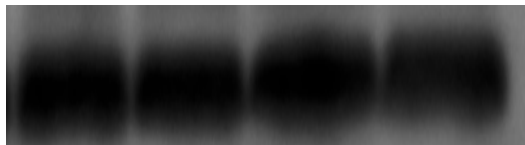

Supplement: MOESM3 [file 9609212]
